# Supplementary material for: pTuneos: prioritizing tumor neoantigens from next-generation sequencing data
Source: PubMed Central journal article supplement (PMC6822339; doi:10.1186/s13073-019-0679-x), 2019-10-30

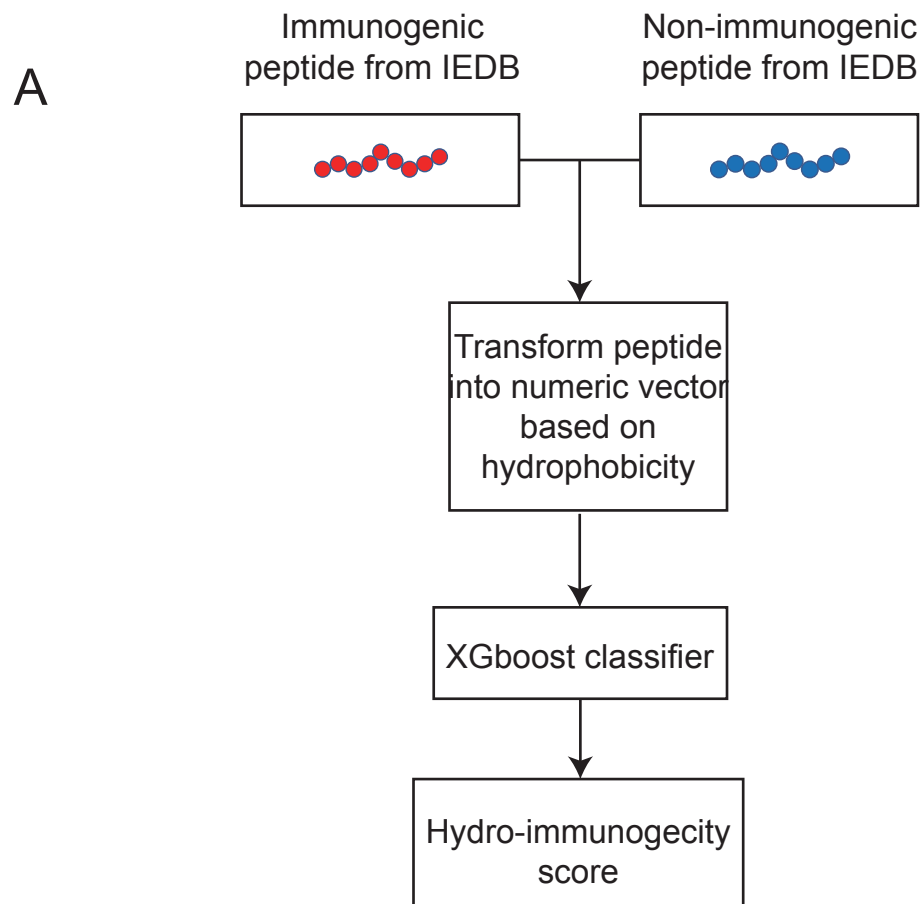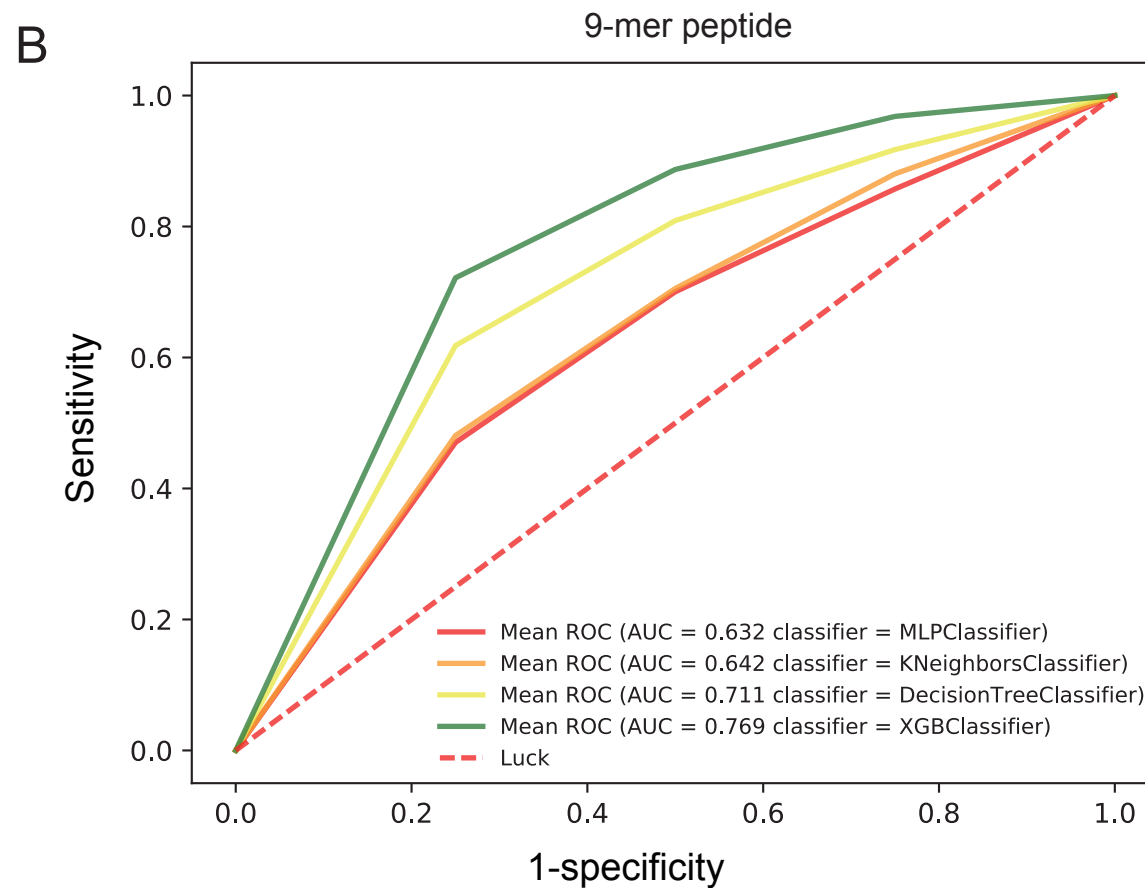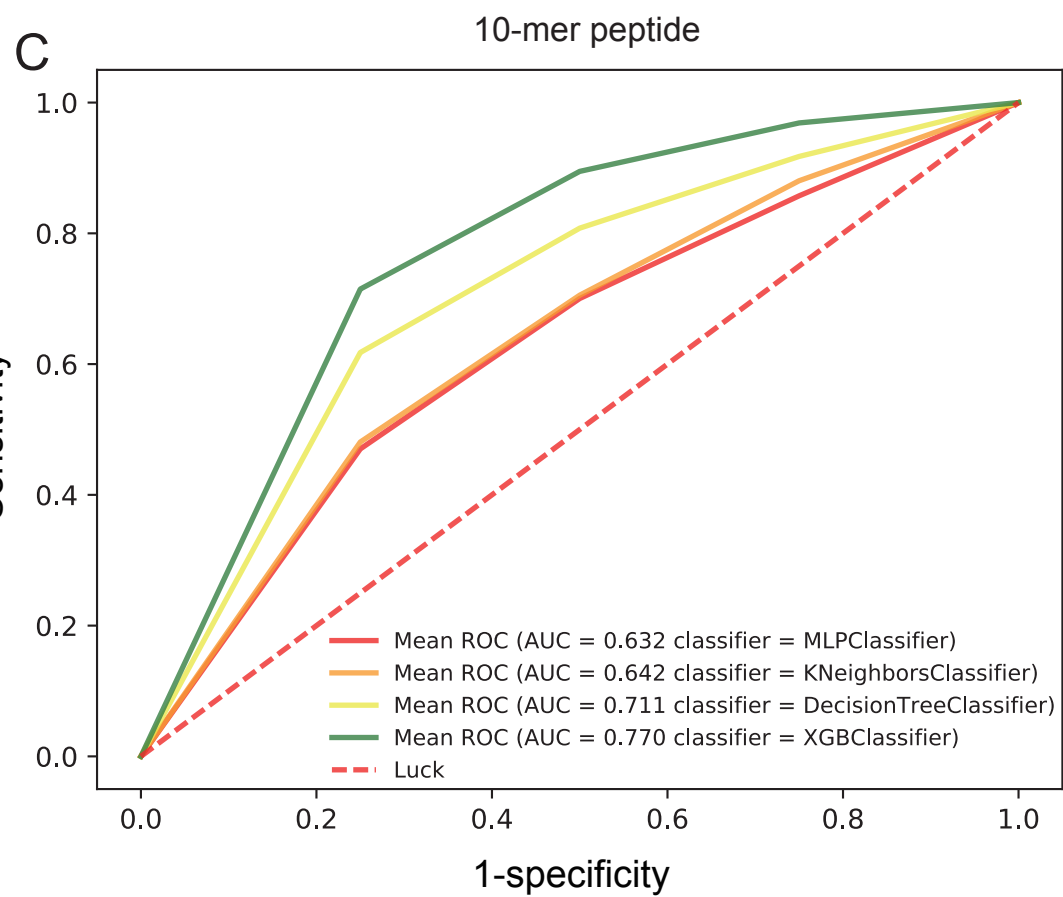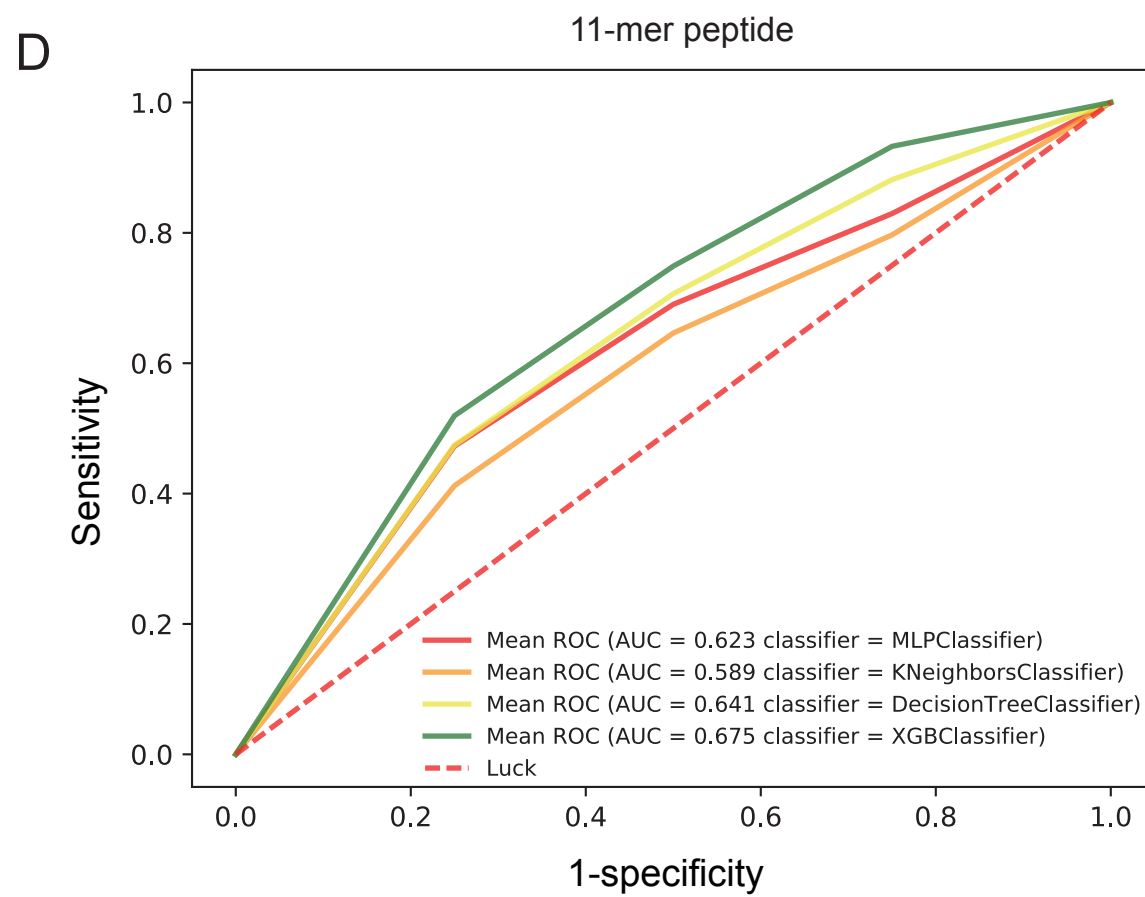

Supplement: 13073_2019_679_MOESM1_ESM.pdf [file 13073_2019_679_MOESM1_ESM.pdf]
